# Supplementary material for: 2014 American Neuropsychiatric Association Annual Meeting Abstracts
Source: Atypon-hosted journal article supplement (doi:10.1176/appi.neuropsych.262abstract), 2014-04-01
Supplement: 179_ds001.pdf [file 179_ds001.pdf]

# ABSTRACTS

## Presented at the 25<sup>th</sup> Annual Meeting of the American Neuropsychiatric Association

February 15-18, 2014

Sheraton Seattle Hotel

Seattle, Washington, USA

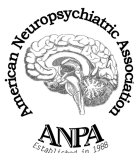

### American Neuropsychiatric Association 2014 Executive Committee

#### President

Sheldon Benjamin, M.D., FANPA

#### President Elect

Jeremy D. Schmahmann, M.D., FANPA

#### Immediate Past President

Daniel R. Wilson, M.D., Ph.D., FANPA

#### Treasurer

C. Edward Coffey, M.D., FANPA

### ANPA Scientific Program

### Committee Members and Reviewers

**Chair:** David B. Arciniegas, M.D., FANPA

**Chair:** C. Alan Anderson, M.D., FANPA

Robert A. Bornstein, Ph.D., FANPA

Joan A. Camprodon, M.D., MPH, Ph.D.

Omar Ghaffar, M.D., M.S.

Richard Ronan Murphy, M.D.

Kaloyan S. Tanev, M.D.

## Awards Presented

at the 25<sup>th</sup> Annual Meeting of the American Neuropsychiatric Association

### Gary J. Tucker, M.D Lifetime Achievement Award in Neuropsychiatry

Established in his memory, the Gary J. Tucker, M.D Award in Neuropsychiatry is the highest honor bestowed by ANPA and is presented to an individual who has demonstrated sustained commitment and service to ANPA and whose career has best exemplified the professional and personal values of Dr. Tucker. These values include academic leadership in Neuropsychiatry,

commitment, mentoring, and scholarship. Recipients shall have demonstrated such values through a lifetime commitment to improving our understanding of brain-behavior relationships as they affect mental illness.

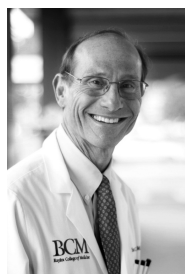

The 2014 inaugural awardee is:  
**Stuart C. Yudofsky, MD, FANPA**

### Fellow of the American Neuropsychiatric Association

The designation of Fellow of the American Neuropsychiatric Association recognizes significant contributions to the field of neuropsychiatry, behavioral neurology, neuropsychology or the clinical neurosciences and to the Association.

The individuals elected as Fellows of ANPA in 2014 are:

**Moises Gaviria, M.D.**

**Kaloyan S. Tanev, M.D.**

**Hal S. Wortzel, MD**

### ANPA Career Development Award

The ANPA Career Development Award Program recognizes an advanced trainee in neuropsychiatry, behavioral neurology or neuropsychology whose accomplishments during training offer outstanding promise of a successful career in neuropsychiatry and the clinical neurosciences.

The Career Development 2014 Awardee is:

**David L. Perez M.D**

### ANPA Young Investigator Awards

The ANPA Young Investigator Award recognizes early trainees who are embarking on promising careers in the clinical neurosciences. The recipients are chosen from the submitted presentations at the Annual Meeting. The decisions are based on the quality of the abstract submission and, more broadly, the candidate's perceived ability to make a contribution to the field with the encouragement and support provided by the award.

The Young Investigator 2014 Awardees are:

**Nolan R. Williams, M.D.**

**Joshua J. Rodgers, M.D.**

### ANPA Clinical Neuroscience Trainee Award

ANPA Clinical Neuroscience Trainee Award recognizes an outstanding trainee with special accomplishments or involvement in the clinical neurosciences. This award was designed to facilitate early involvement in ANPA by highly motivated residents in psychiatry or neurology, considering careers in neuropsychiatry or behavioral neurology, or doctoral candidates considering careers in neuropsychology.

The Clinical Neuroscience Trainee 2014 Awardee is:

**Jennifer M. Erickson, D.O.**

Full texts of the abstracts presented at the Meeting accompanies the online edition of the spring 2014 issue, at <http://neuro.psychiatryonline.org>

The abstracts can be cited in the same format:

Author name(s): Title of abstract (abstract #), in Abstracts Presented at the 25<sup>th</sup> Annual Meeting of the American Neuropsychiatric Association. J Neuropsychiatry Clin Neurosci 2014; Spring; 26(2): P# (published online May 2014) at <http://neuro.psychiatryonline.org>).

Posters designated with (C) were also presented orally at the Clinical Platform Session, February 17, 2014, 2:00 – 3:30 pm. Posters designated with (R) were also presented orally in the Research Platform Session, February 17, 2014, 3:45 – 5:15 pm.

## POSTER SESSION I

Monday, February 17, 2014, 5:30 – 6:30 pm

---

**P1. Frontolimbic Neural Circuit Changes Associated with Clinical Improvement Following Transference-Focused Psychotherapy in Borderline Personality Disorder**

David Perez, David Vago, Hong Pan, James Root, Benjamin Fuchs, Jane Epstein, John Clarkin, Mark Lenzenweger, Kenneth Levy, David Silbersweig, Emily Stern (R)

**P2. Graph Theoretical Analysis Reveals Reduced Integration of the Left Amygdala into the Whole Brain Resting State Network in Posttraumatic Stress Disorder: A Magnetoencephalography (MEG) Study**

Jared Rowland, Jennifer Stapleton-Kotloski, Greg Alberto, Justin Rawley, Robert Kotloski, Katherine Taber, Dwayne Godwin (R)

**P3. Sex Differences in Visuospatial Abilities are Maintained During GnRH Agonist-Induced Hypogonadism**

Gioia Guerrieri, Pamela Keenan, Carolyn Gibson, David Rubinow, Peter Schmidt (R)

**P4. Neuroanatomical Correlates of Working Memory in Children and Adolescents: Performance vs. Behavioral Rating Measures**

Nazlie Faridi, Sherif Karama, Miguel Burgaleta, Alan Evans, Vladimir Fonov, Louis Collins, Deborah Waber (R)

**P5. Stimulus-Value and Action-Value Learning in Patients with Frontotemporal Dementia**

Mandana Modirrousta, Brad Dickerson (R)

**P6. Identifying an Evidence Based Tool for Cognitive Screening in Psychiatric Patients: Literature Review**

Vishesh Agarwal, Carissa Caban-Aleman, David Greenspan

**P7. Reversible Malignant Catatonia as Part of the Presenting Clinical Syndrome of Amyotrophic Lateral Sclerosis and Behavioral Variant Frontotemporal Dementia due to TDP-43 Positive Frontotemporal Lobar Degeneration**

Joshua Rodgers, Michael Schrift (C)

**P8. Psychogenic Non-Epileptic Seizures in an adolescent with Asperger's Syndrome Treated to Complete Remission with Modified Cognitive Behavioral Therapy**

Joshua Rodgers, Cheryl Carmin, Kathy Kelley

**P9. Postpartum Acute Disseminated Encephalomyelitis Successfully Treated with Plasmapheresis**

Lokesh Shahani (C)

**P10. Steroid Unresponsive Anti-NMDA Receptor Encephalitis during Pregnancy Successfully Treated with Plasmapheresis**

Lokesh Shahani

**P11. Compulsions Without Obsessions - Differentiating Behavioral Variant Frontotemporal Dementia from Primary Obsessive-Compulsive Disorder**

Simon Ducharme, Bradford Dickerson, Darin Dougherty, Bruce Price (C)

- P12. A Case of Dual DBS Implantation for Parkinson's Disease and Obsessive-Compulsive Disorder**  
Nolan Williams, Baron Short, Alexandra Jeffery, Greg Sahlem, Suzanne Kerns, Emily Williams, Colleen Hanlon, Gonzalo Revuelta, Istvan Takacs, Mark George (C)
- P13. The Challenges of Treating Catatonia in Pregnancy**  
Amber May
- P14. Neuropsychiatric Treatment of Pediatric Intracranial Right Hemisphere Hamartoma: A Case Study**  
Glenda Matthews, Daniel Matthews, John Seals, Larry Fisher, Stephanie Arsenault
- P15. Pathological Laughter and Crying in Mood Disorders Following Traumatic Brain Injury**  
Durga Roy, Dingfen Han, Vani Rao
- P16. Posttraumatic Stress Disorder is Associated with Impaired Coronary Distensibility and Extent of Coronary Atherosclerosis**  
Naser Ahmadi, Nutan Vaidya
- P17. Post-traumatic Stress Disorder, Metabolic Syndrome and Mortality; the Role of Selective Serotonin Reuptake Inhibitor and Tricyclic Antidepressants**  
Naser Ahmadi, Rachel Yehuda, Ramin Ebrahimi, Nutan Vaidya
- P18. The Long Term Clinical Outcome of Post-traumatic Stress Disorder and Major Depressive Disorder with and without Electroconvulsive Therapy**  
Naser Ahmadi, Lori Moss, Nutan Atre-Vaidya (R)
- P19. Excess Risk of Coronary Atherosclerosis and Cardiovascular Mortality in Post-traumatic Stress Disorder with Traumatic Brain Injury as compared to Posttraumatic Stress Disorder Alone**  
Naser Ahmadi, Ramin Ebrahimi, Rachel Yehuda, Nutan Atre-Vaidya
- P20. Creating a Virtual Mild TBI: Patient Conceptual Design and Initial Database Development**  
Mohammed Ahmed, Raghavi Sakpal, Robin Hurley, Dale-Marie Wilson, Christine Elnitsky, David Cifu, Joel Scholten, Chloe Bomberger, Katherine Taber
- P21. A 21-Year Old Man with ASD, Refractory Schizophrenia, Facial Dysmorphism and a Duplication of Chromosome 7q36.2 that Overlaps with DPP6**  
Robert Stowe, Christine Tyson, Monica Hrynchak, Randall White, Donna Lang, Anthony Bailey, Patrick MacLeod, William Honer (C)
- P23. Hoarding Behavior: Not Limited to OCD**  
Arnabh Basu
- P24. Psychosis of Neurosyphilis in A Chinese Immigrant**  
Arnabh Basu
- P25. An Elderly Woman with Rapidly Fluctuating Psychotic Symptoms and Frontal Meningioma**  
Jeffrey Bennett, Mohsin Khan
- P26. Excessive Writing in a Man with Traumatic Brain Injury: Case Report and Discussion of Hypergraphia**  
Jeffrey Bennett, Aghaegbulam Uga
- P27. Non-Convulsive Status Epilepticus in a Woman with Psychosis and Epilepsy Treated with Clozapine: An EEG and Video Evidence Presentation**  
Jeffrey Bennett, Asha Dusad
- P30. Co-Occurrence of Mood Disorders and Intellectual Disability: More Than Just Bad Brain?**  
Katherine Brownlowe
- P31. IMPOSTER! The Capgras Delusion and Caregiver Burden**  
Elizabeth DeGrush, Ankur Butala, Sheldon Benjamin
- P32. Dextromethorphan/Quinidine in the Treatment of Catatonia: A Case Series**  
Jason Caplan
- P33. Neuropsychiatric and Seizure Outcomes in Autoimmune Limbic Encephalitis**  
Rani Sarkis, Zeina Chemali
- P34. Frontotemporal Dementia Following Decades of Bipolar Disorder; Prodrome, Risk Factor, or Coincidence?**  
Joseph Cooper, Vijay Gorrepati, Amy Yang, Michael Marcangelo
- P35. Excited Catatonia with a Normal Video EEG; A Case of Anti-NMDA Receptor Encephalitis**  
Colin Pesyna, Laura Benson, Maureen Lacy, Joseph Cooper (C)

**P36. A Unique Differential**

Adriana de Julio, Geoffrey Levin, Sarah Hutton,  
Sarah Berth

**P37. Phenomenology and Neuroimaging Correlates of A Permanent Autopsy Case**

Yazmin de la Garza-Neme, Bruno Estañol,  
Gloria Adame Ocampo, Fatima Meza Urzua

**P38. Association Between Patient Characteristics and Florbetapir F18 PET Amyloid Neuroimaging at Baseline in Patients with Mild or Moderate Alzheimer's Dementia**

Elisabeth Degenhardt, Michael Witte,  
Michael Case, Peng Yu, David Henley,  
Helen Hochstetler, Deborah DSouza,  
Paula Trzepacz

**P39. Ophthalmologic Delusional Parasitosis in Parkinson's Disease**

Sol Durand-Arias, Yazmi De la Garza-Neme

**P40. MoCA vs. MMSE in Mild Cognitive Impairment and Early-Stage Alzheimer's Disease**

Paula Trzepacz, Helen Hochstetler, Brett Walker,  
Shufang Wang, Michael Witte, Andrew Saykin

**P41. The Insular Cortex: Structure, Function, and Neuropsychiatric Implications**

Robert Shura, Robin Hurley, Katherine Taber

**P42. A Case of Limbic Encephalitis: A Case Initially Misdiagnosed as a Primary Psychiatric Disorder**

Neil Brahmabhatt, Thomas Heinrich, Rajni Aulakh,  
Suraj Singh

## POSTER SESSION II

Tuesday, February 18, 2014, 5:30 – 6:30 pm

---

**P43. A Retrospective Multidimensional Comparison of Referred DSM IV Autism and Asperger Pre-pubertal Children: Do They Qualify Under DSM 5?**

Drake Duane, Amanda Stadel, Diana Rayes,  
Mimi Tokuyama

**P44. Emotional Decision-Making, Utilitarianism, and Ability to Consent in a Patient with Meningioma Involving the Ventromedial Prefrontal Cortex**

Brian Gomoll, Michael Schrift, Rebecca Cho

**P45. Malignant Catatonia and Status Epilepticus of Unclear Origin Treated With Electroconvulsive Therapy: Retrospective Case Study and Discussion**

Brian Gomoll, Melissa Jones, Michael Schrift

**P47. Is this Patient Depressed? - Neuropsychiatric Differential Diagnosis of the Psychomotor Slowed Patient**

Colin Harrington, Davin Quinn

**P48. ALS-FTD Misidentified as Wernicke-Korsakoff Syndrome: Clinical and Treatment Implications**

Aaron Hauptman, Erica Garcia-Pittman,  
Jean Dunham, Carlos Tirado, Carlos

**P52. Early Onset Alzheimer's Dementia- A PET Scan Study**

Taranjett Jolly

**P55. IV Ketamine Efficacy in the Outpatient Clinic for Treatment-Resistant Mood Disorders**

John Claude Krusz

**P56. ANPA Membership Committee Past Members Survey: How Can ANPA Improve?**

Margo Lauterbach, Elizabeth DeGrush,  
Sheldon Benjamin

**P57. A Case of Cerebellar Vermian Hypoplasia Presenting with Spontaneous Confabulation and Erotomania**

Daniel Lee, Joshua Rodgers, Michael Schrift

**P58. Inpatient Physical Medicine and Rehabilitation Treatment for Functional Neurological Disorder in Two US Veterans**

Eryn Lonquist, David Coons, Hal Wortzel

**P60. Rationale for Hypothermia as Treatment of Acute Methamphetamine Intoxication; Putting Ice on Ice**

Natalie Erbs, David Kasick, Jason Caplan,  
Curtis McKnight

**P61. Influence of Psychiatric Comorbidities in Migraineurs in the Emergency Department: A Cross Sectional Analysis**

Mia Minen, Kaloyan Tanev

**P62. Clinical and Forensic Applications of the SOBIN (Subtle Organic Brain Inventory of Neppe) with the INSET (Inventory of Neppe of Symptoms of Epilepsy and the Temporal Lobe)**

Vernon Neppe

**P63. The Neppe Narcolepsy Questionnaire (NNQ): Clinical Applications and HLA Context**

Vernon Neppe

- P64. Clinical Applications of the STRAW Measures of Severity and Frequency of Involuntary Movements Examination in Tardive Dyskinesia and Movement Disorders**  
Vernon Neppe
- P65. Psychometric Properties of the Bush Francis Catatonia Rating Scale**  
Kathy Niu, Jo Ellen Wilson, Stephan Heckers, Stephen Levine
- P66. Catatonia in Anti-NMDA-encephalitis: Case Reports and Review of the Literature**  
Pongsatorn Paholpak, Poonsri Rangseekajee, Pattharee Paholpak, Kevarin Kriengburapa, Somsak Tiamkao, Narongrit Kasemsap, Mario Mendez
- P67. Mesial Temporal Sclerosis as a Potential Risk Factor for Catatonia: a Case Report**  
Amy Corcoran, Lawren VandeVrede, Eric Gausche, Michael Schrift, Matthew Burns, Johnathan Coleman
- P68. Neuropsychiatric Management of bvFTD**  
Donald Eknoyan, Mario Mendez
- P69. Electroconvulsive Therapy-Induced Dissociation of Parkinsonism and Depression from Core Features of Normal Pressure Hydrocephalus**  
Emily Williams, Nolan Williams, Johathan Snipes, Baron Short, Gonzalo Revuelta, Mark George
- P70. Neuroversion: Using Electroconvulsive Therapy as a Bridge to Deep Brain Stimulation Implantation**  
Nolan Williams, Greg Sahlem, Baron Short, Alexandra Jeffery, Carol Burns, Emily Williams, 4v1stvan Takacs, Gonzalo Revuelta, Mark George
- P71. Stimulating Frontostriatal Circuitry in Parkinson's Disease**  
Nolan Williams, Baron Short, Alexandra Jeffery, Emily Williams, Greg Sahlem, Colleen Hanlon, Jeffrey Korte, Gonzalo Revuelta, Mark George
- P72. Comorbid Schizophrenia and Parkinson's Disease: A Pharmacologic Quandry**  
Aghaegbulam Uga, Trinadha Pilla, Shreedhar Kulkarni, Malati Pilla, Vineka Heeramun, Jeffrey Bennett
- P73. Sudden Onset of Aphasia: Is it Topiramate or Dementia?**  
Aghaegbulam Uga, Sheila Thomas, Sarah Shah, Shreedhar Kulkarni, Trinadha Pilla, Chenelle Joseph, Jeffrey Bennett
- P74. Depression, APOEε4, and the Risk of Incident Mild Cognitive Impairment: A Population-based Study**  
Boston Lotto-Newquist, Jazmin Acosta, Rosebud Roberts, Michelle Mielke, Teresa Christianson, V. Pankratz, Gorazd Bernard Stokin, Ronald Petersen, Yonas Geda
- P75. Behavioral and Cognitive Late Effects in a Case of Cerebellar Tumor: a Challenge to Conventional Treatment**  
Mary George
- P76. Cessation of Auditory Verbal Hallucinations after Stroke in a Patient with Schizophrenia**  
David Arciniegas, Kimberly Frey, C. Anderson
- P77. A Dementia Care Shared Medical Visit Model for Patients and Caregivers Using Telemedicine**  
Lucy Wang, Richard Murphy, Gayle Robinson, Kristine Fredrickson, Stephen Thielke, Debby Tsuang, Soo Borson
- P78. A Case Study: The use of Chronotherapy to Treat Suicidality and Highly Treatment Resistant Depression**  
Greg Sahlem, Nolan Williams, Benjamin Kalivas, Amanda Roper, Emily Williams, Thomas Uhde, Mark George, Baron Short
- P79. A Heuristic for the Clinical Evaluation of Traumatic Brain Injury and Aggression**  
Hal Wortzel, David Arciniegas
- P80. Neuromyotonia and Limbic Encephalitis with LGI1 Antibodies**  
Jennifer Erickson, Davin Quinn
- P81. Catatonia as a Neuropsychiatric Manifestation in Paraneoplastic Encephalitis. Case Report**  
Emmanuel Rodríguez Chávez
- P82. Teaching Materials to Translate Neuroanatomical Knowledge from Textbook to the War-Related Blast Injury Patient- Part III.**  
Robin Hurley, Katherine Taber
